# Supplementary material for: Enhancing the tribopositive characteristics of polyvinyl alcohol (PVA)-carbon composites by optimizing the PVA-carbon interaction with various carbon fillers
Source: Royal Society of Chemistry journal article supplement (doi:10.1039/d4na00820k), 2024-12-09
Supplement: d4na00820k1.pdf [file d4na00820k1.pdf]

## Supplementary Information

Enhancing the tribopositive characteristics of polyvinyl alcohol (PVA)-carbon composites by optimizing the PVA-carbon interaction with various carbon fillers

Jian Ye Cheong <sup>a</sup>, Jason Soon Chye Koay <sup>b, c</sup>, Sanjeev Raja Gopal <sup>a</sup>, Thamilselvi Velayutham

<sup>a, \*</sup>, Wee Chen Gan <sup>b, c, \*</sup>

<sup>a</sup> *Low Dimensional Materials Research Center, Department of Physics, Faculty of Science, Universiti Malaya, 50603 Kuala Lumpur, Malaysia*

<sup>b</sup> *School of Energy and Chemical Engineering, Xiamen University Malaysia, Selangor Darul Ehsan 43900, Malaysia*

<sup>c</sup> *Kelip-kelip! Center of Excellence for Light Enabling Technologies*

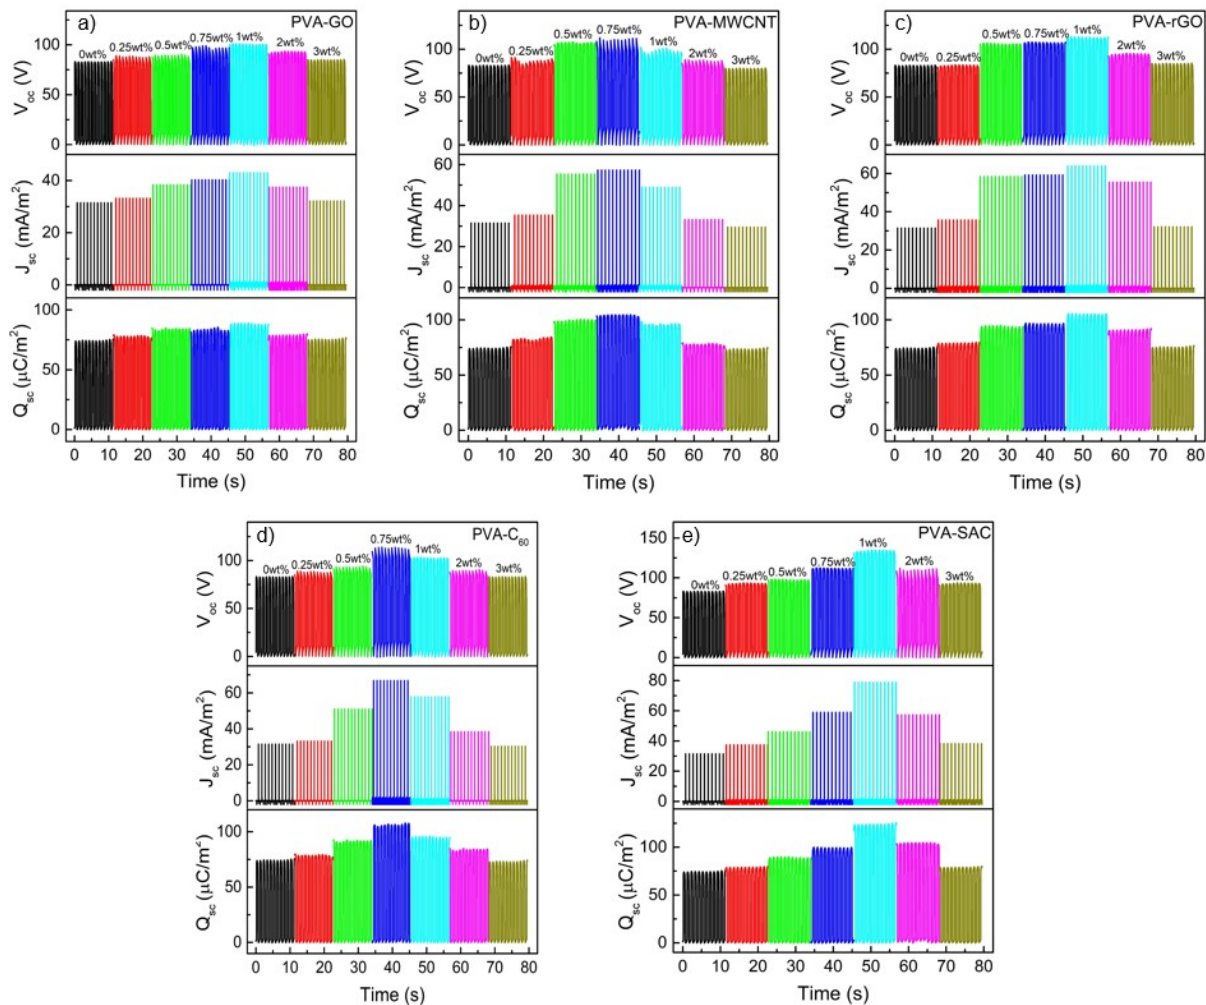

Figure S1: Open circuit voltage ( $V_{oc}$ ), short-circuit current density ( $J_{sc}$ ) and short-circuit charge density ( $Q_{sc}$ ) of pristine PVA and each PVA-carbon at loading concentrations from 0.25 wt% to 3 wt%.

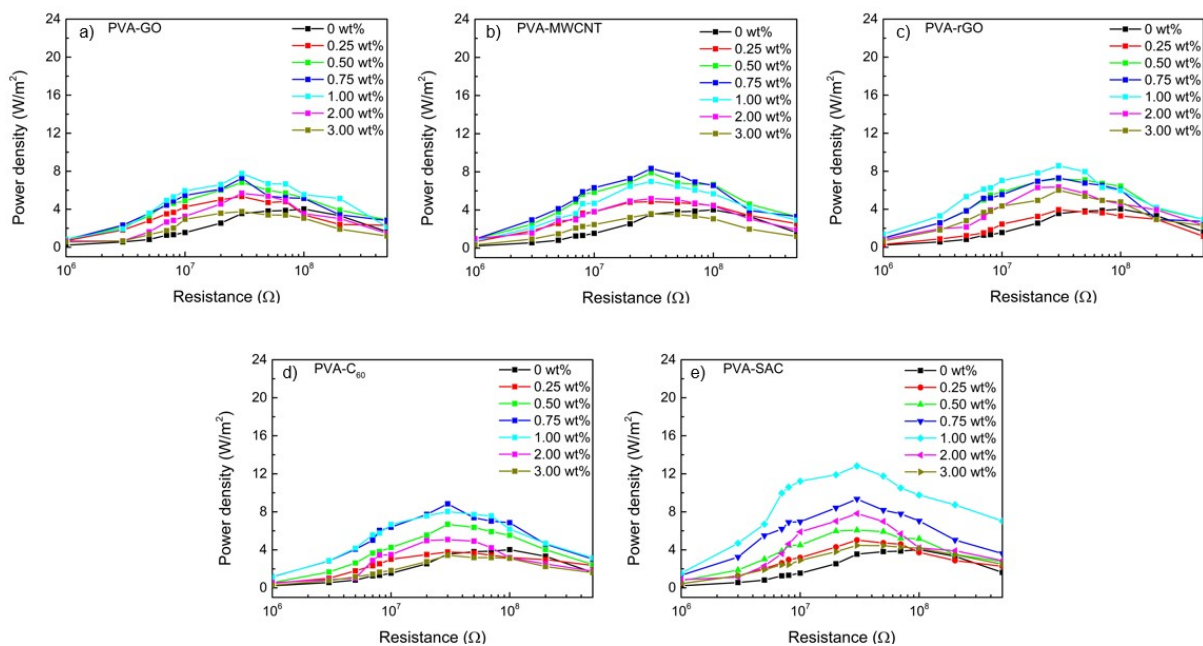

Figure S2: Power density curves of pristine PVA and each PVA-carbon at loading concentrations from 0.25 wt% to 3 wt%.

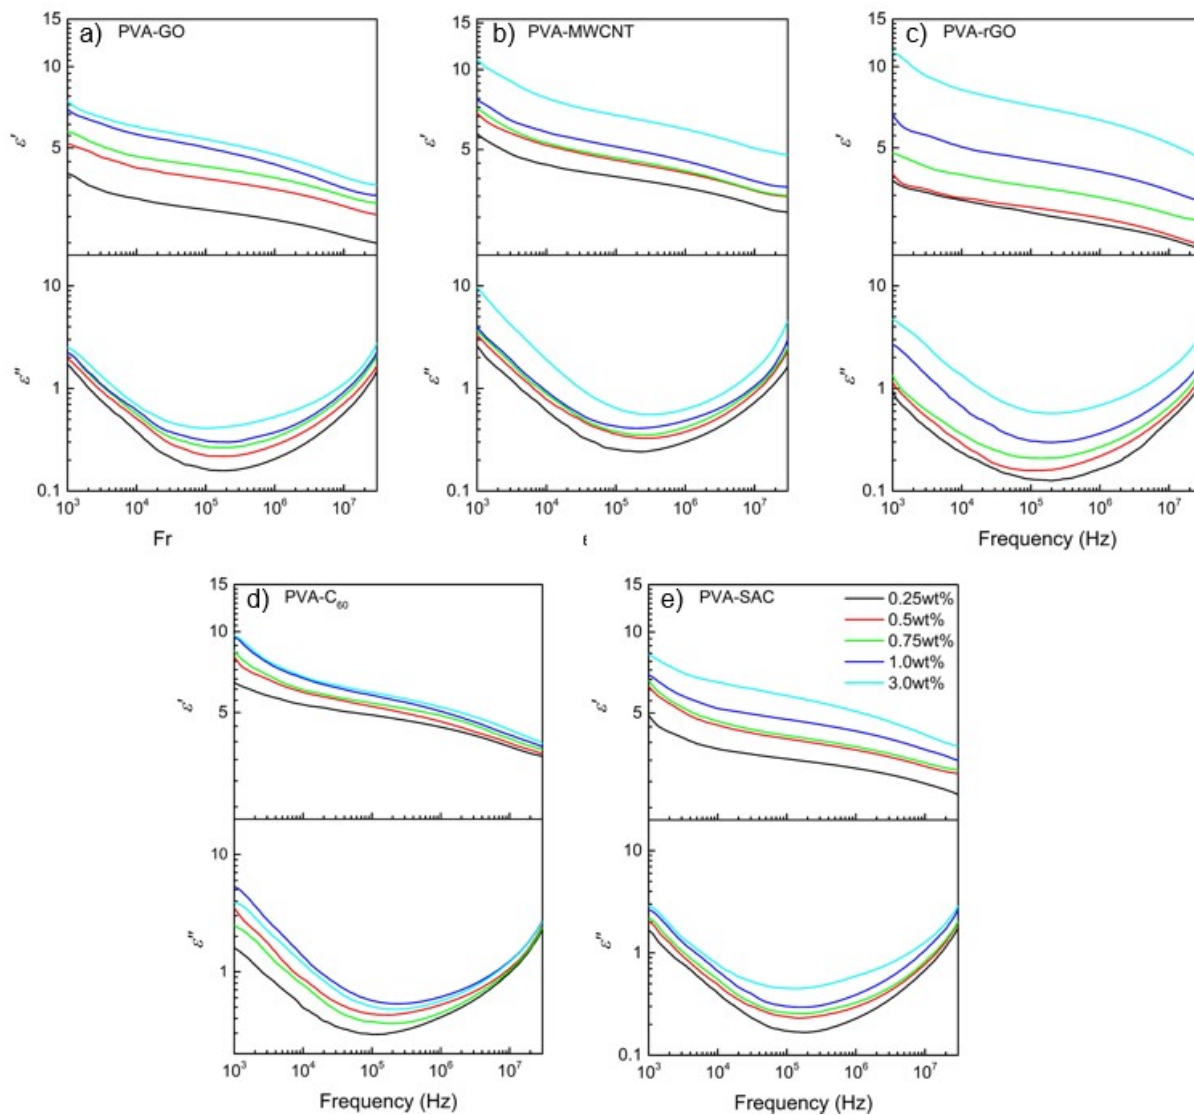

Figure S3: Dielectric constant and dielectric loss of pristine PVA and each PVA-carbon at loading concentrations from 0.25 wt% to 3 wt%.

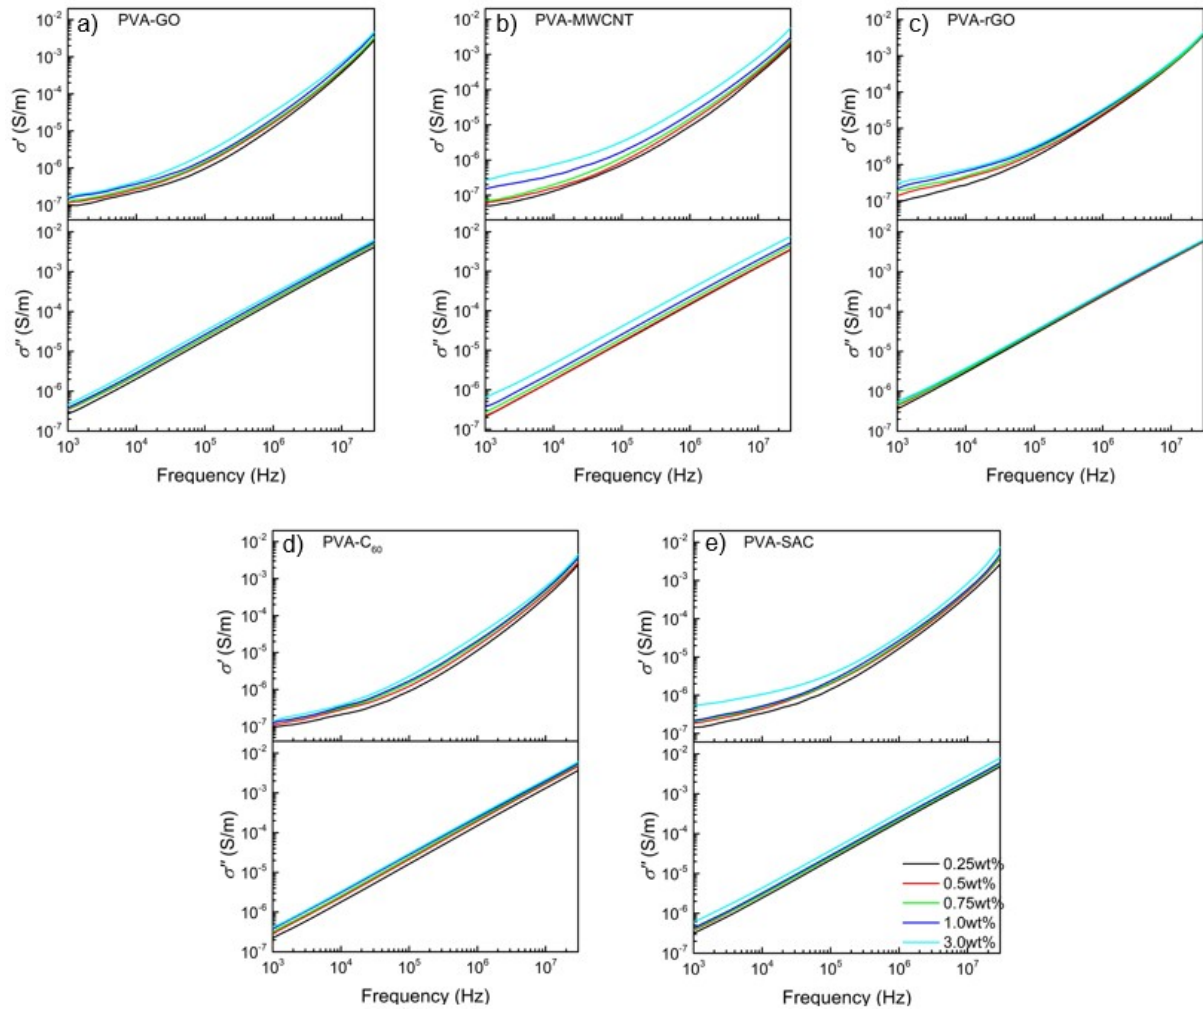

Figure S4: Real and imaginary conductivity of pristine PVA and each PVA-carbon at loading concentrations from 0.25 wt% to 3 wt%.

Table S1: Typical dielectric constants at 1kHz of polymers before and after the addition of carbon-based fillers.

| Host polymer                                | Carbon filler   | Loading concentration | Host polymer's dielectric constant | Composite's dielectric constant | References                        |
|---------------------------------------------|-----------------|-----------------------|------------------------------------|---------------------------------|-----------------------------------|
| PVA                                         | rGO             | 1.00 wt%              | 3.6                                | 9.6                             | Current Work                      |
| PVA                                         | SAC             | 1.00 wt%              |                                    | 7.7                             |                                   |
| PVA                                         | GO              | 1.00 wt%              |                                    | 6.9                             |                                   |
| PVA                                         | C <sub>60</sub> | 0.75 wt%              |                                    | 5.8                             |                                   |
| PVA                                         | MWCNT           | 0.75 wt%              |                                    | 4.8                             |                                   |
| Ethylene vinyl acetate copolymer            | CNT             | 1.00 vol%             | <10                                | >450                            | Mittal et al. 2023 <sup>[1]</sup> |
| Polyurethane /polyaniline (70/30) copolymer | rGO             | 2.00 wt%              | 100                                | >800                            | Dash et al. 2023 <sup>[2]</sup>   |
| PDMS                                        | MWCNT           | 1.00 wt%              | 2.6                                | >400                            | Liu et al. 2020 <sup>[3]</sup>    |
| Poly-propylene                              | MWCNT           | 2.56 vol%             | 2.4                                | >3000                           | Ameli et al. 2014 <sup>[4]</sup>  |

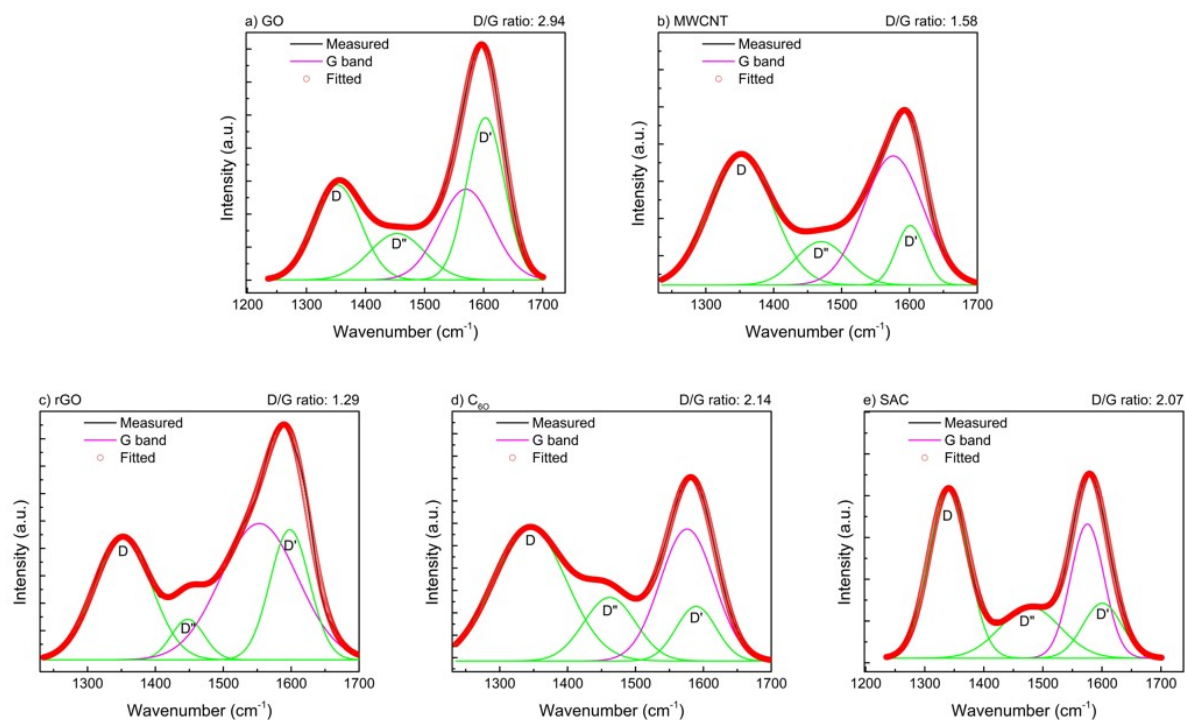

Figure S5: Peak deconvolution of the Raman spectra and calculated D/G ratio of each carbon allotrope.

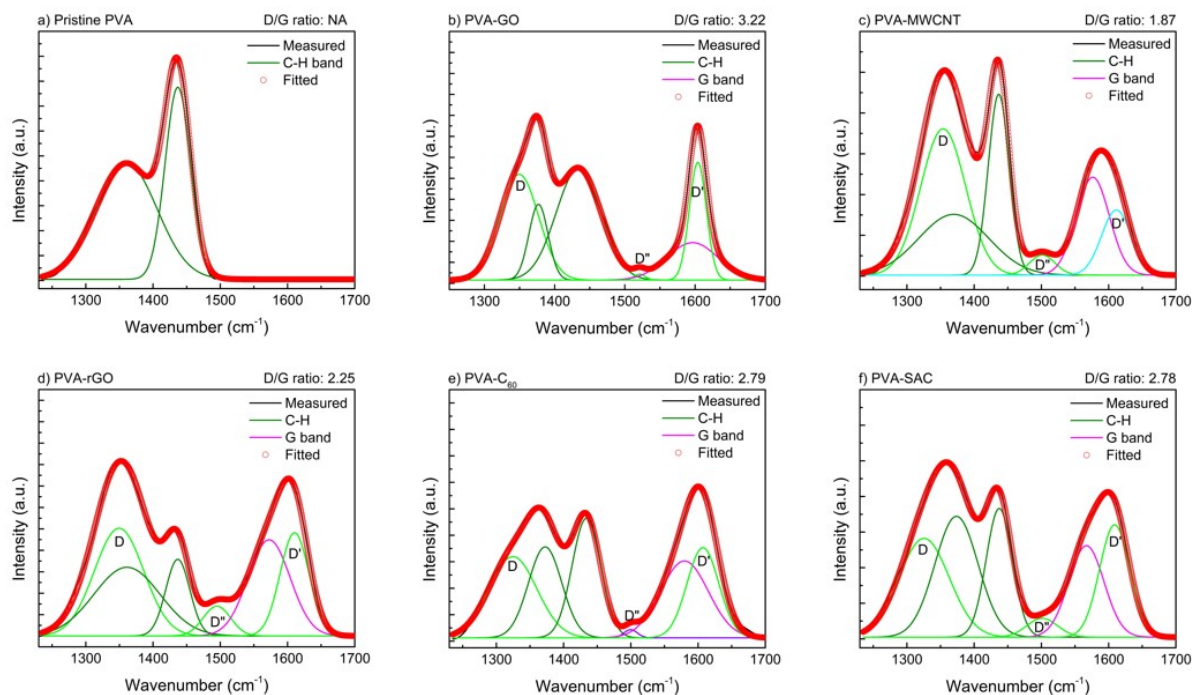

Figure S6: Peak deconvolution of the Raman spectra and calculated D/G ratio of each PVA-carbon.

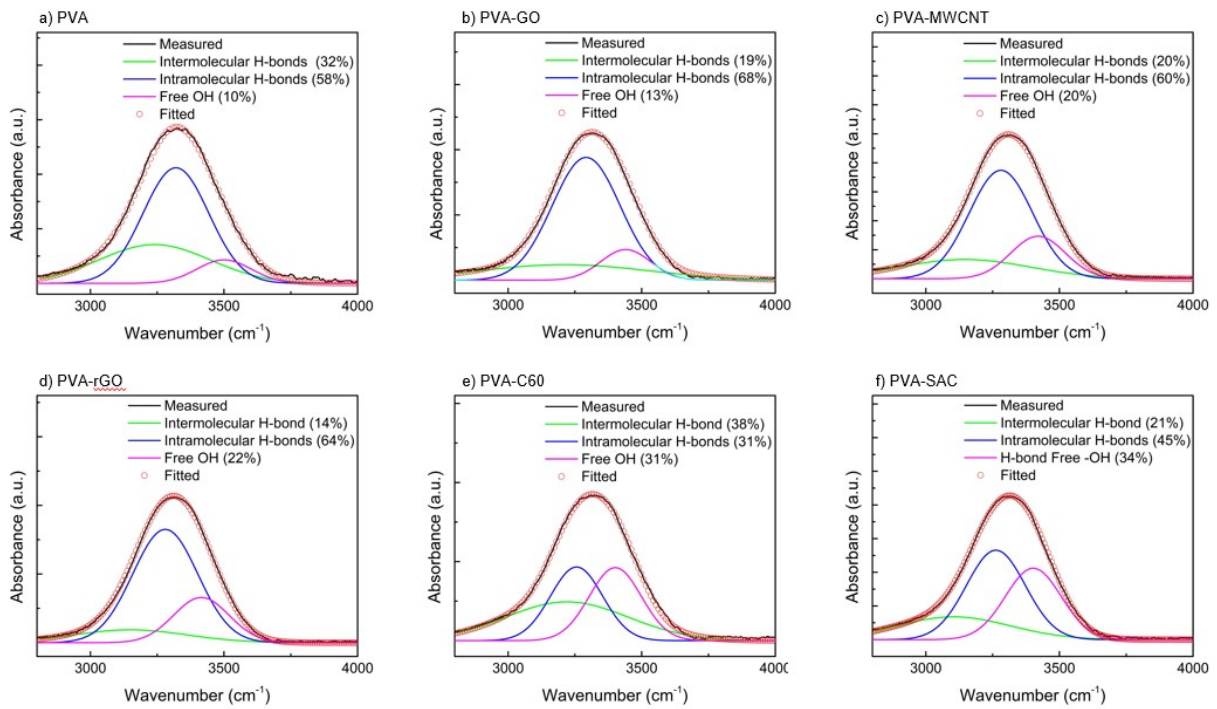

Figure S7: Peak deconvoluted FTIR spectra of pristine PVA and each PVA-carbon.

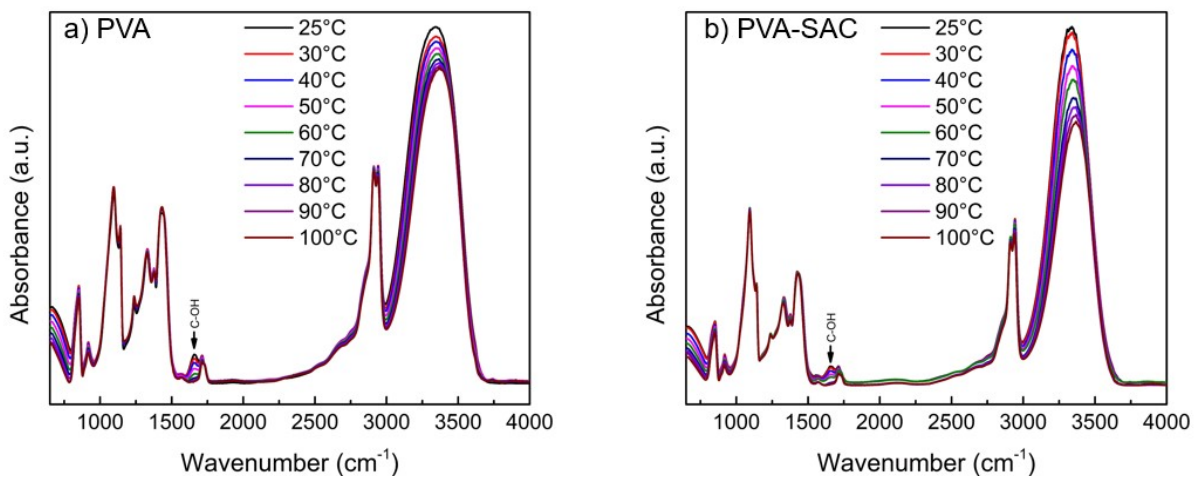

Figure S8: Temperature dependent FTIR for pristine PVA and PVA-SAC ranging from 25°C to 100°C.

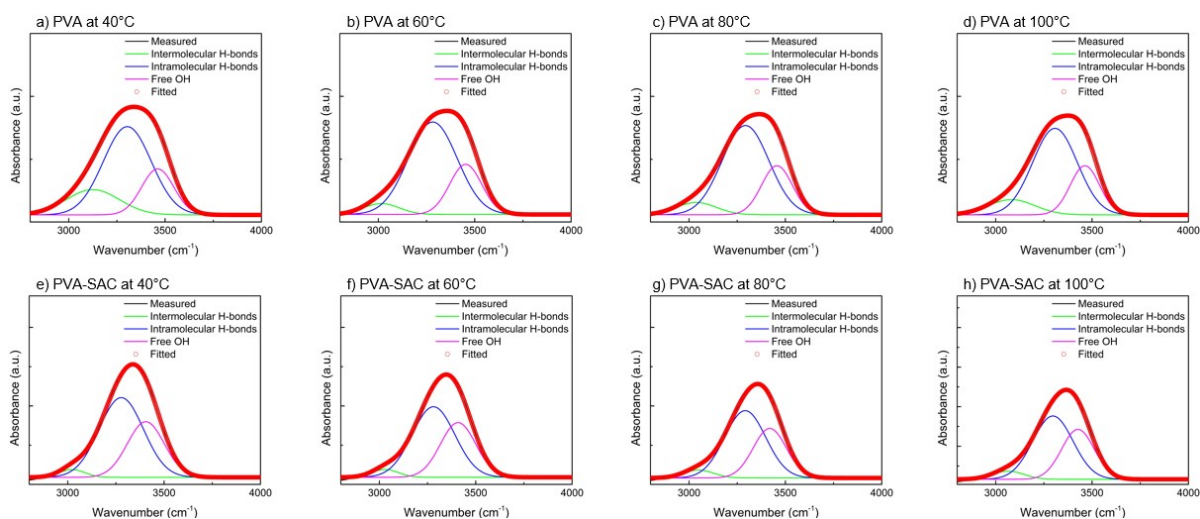

Figure S9: Deconvolution of temperature-dependent FTIR spectra of pristine PVA and PVA-SAC at 40°C, 60°C, 80°C and 100°C.

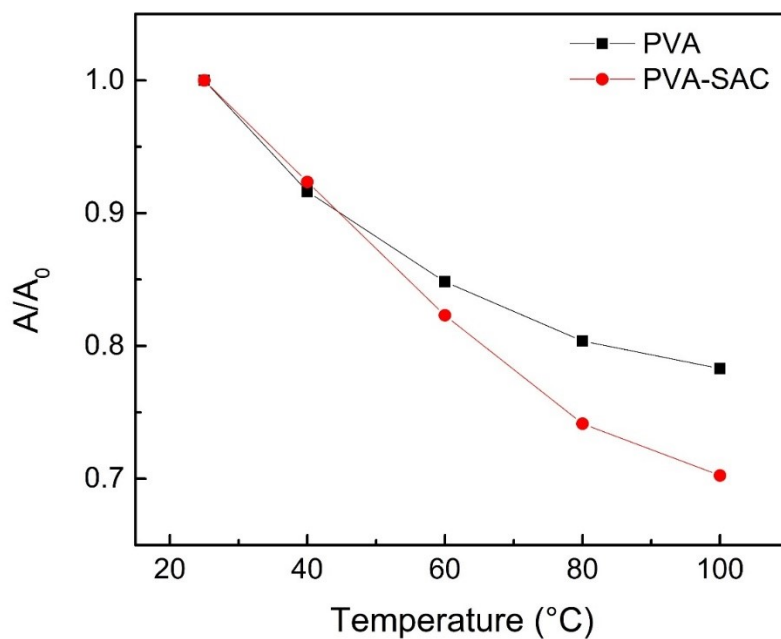

Figure S10: Normalized area under the curve ( $A/A_0$ ) as a function of temperature for pristine PVA and PVA-SAC. A represents the area under the curve at 25°C, while  $A_0$  denotes the area under the curve at the specified temperature.



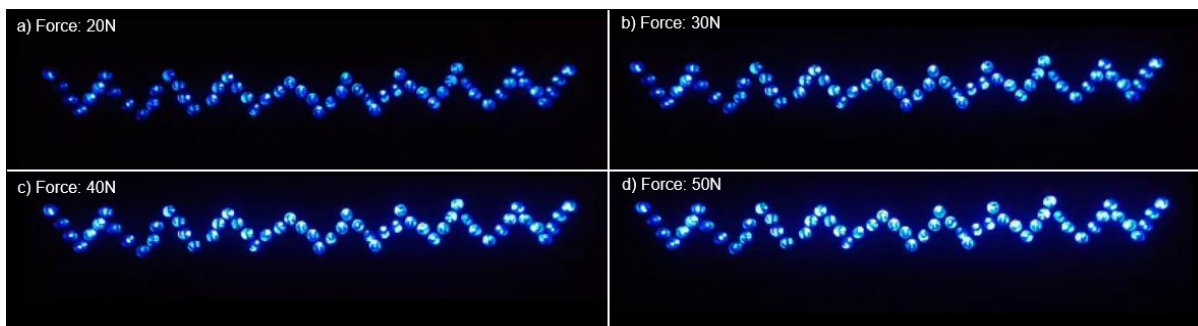

Figure S11: PVA-SAC/SR TENG lighting up LEDs during CS under different forces.

Table S2: SEM images of pristine PVA at 5k, as well as PVA-GO, PVA-MWCNT, PVA-rGO, PVA-C60, and PVA-SAC at magnification of 10k, 20k and 50k.

| Sample              | FESEM Images                                                                                                             |                                                                                                                           |                                                                                                                            |
|---------------------|--------------------------------------------------------------------------------------------------------------------------|---------------------------------------------------------------------------------------------------------------------------|----------------------------------------------------------------------------------------------------------------------------|
| <b>Pristine PVA</b> | 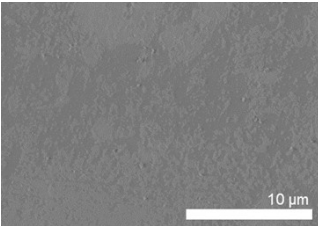 <p>10 μm</p> <p>5k magnification</p> |                                                                                                                           |                                                                                                                            |
| <b>PVA-GO</b>       |  <p>5 μm</p> <p>10k magnification</p> |  <p>2 μm</p> <p>20k magnification</p> |  <p>1 μm</p> <p>50k magnification</p> |
| <b>PVA-MWCNT</b>    |  <p>5 μm</p> <p>10k magnification</p> |  <p>2 μm</p> <p>20k magnification</p> |  <p>1 μm</p> <p>50k magnification</p> |
| <b>PVA-rGO</b>      |  <p>5 μm</p> <p>10k magnification</p> |  <p>2 μm</p> <p>20k magnification</p> |  <p>1 μm</p> <p>50k magnification</p> |

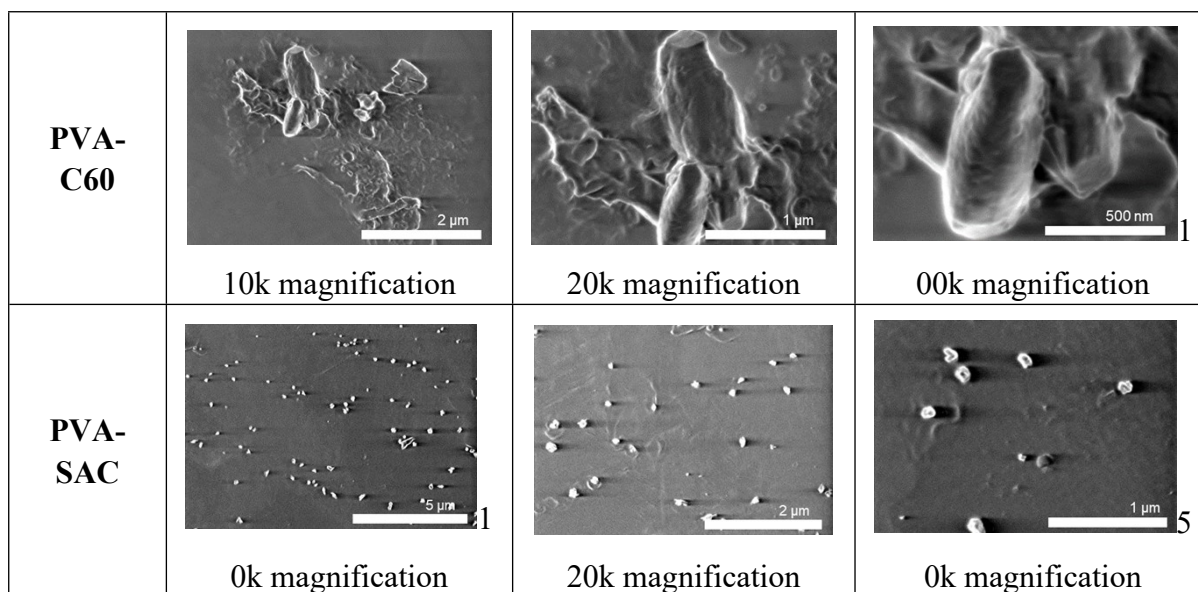

## References

- 1 S. Mittal, R. K. Mondal, K. A. Dubey and Y. K. Bhardwaj, *J. Appl. Polym. Sci.*, 2024, **141**. DOI:10.1002/app.54933.
- 2 K. Dash, B. Nayak and B. Prasad Sahoo, *Mater. Today Proc.*, 2023. DOI:10.1016/j.matpr.2023.02.081.
- 3 Z. Liu, M. Muhammad, L. Cheng, E. Xie and W. Han, *Appl. Phys. Lett.*, 2020, **117**. DOI:10.1063/5.0025001.
- 4 A. Ameli, P. U. Jung and C. B. Park, *Carbon N. Y.*, 2013, **60**, 379–391. DOI: 10.1016/j.carbon.2013.04.050.
